# Supplementary material for: A novel approach for on-site screening of organophosphorus nerve agents based on DTNB modified AgNPs using surface-enhanced Raman spectrometry
Source: Royal Society of Chemistry journal article supplement (doi:10.1039/d2ay01307j), 2022-01-01
Supplement: d2ay01307j1.pdf [file d2ay01307j1.pdf]

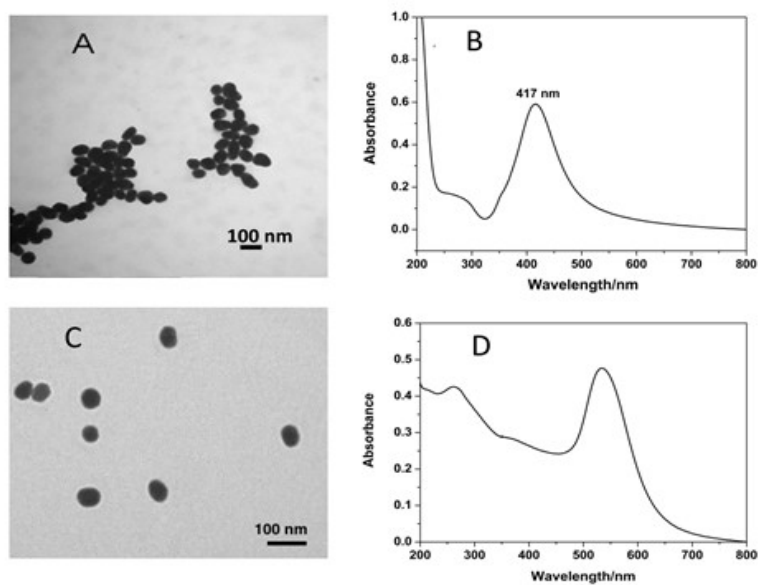

Figure. S1 TEM and UV-Vis of synthesized AgNPs (a,b) and AuNPs (c,d)

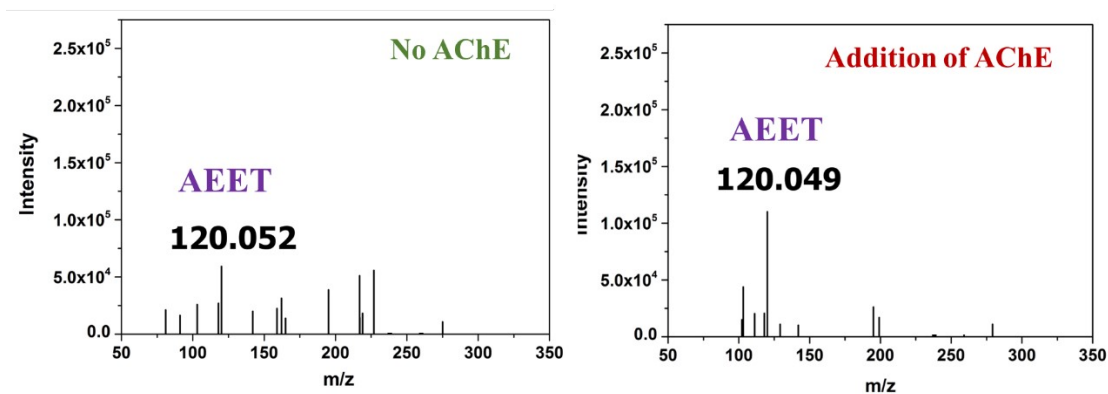

Figure.S2 Monitor of the hydrolysis reaction between AChE and AEET

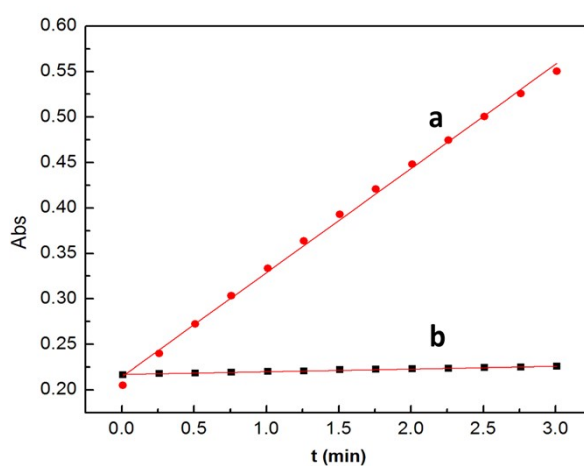

Figure.S3 Enzyme activity assay curve between AChE and ATCh (a) and AEET (b).
